# Supplementary material
Source: PubMed Central journal article supplement (PMC6795318)
Supplement: JGMED18010781.pdf [file JGMED18010781.pdf]

## Residency Program Survey

### Consent to Participate in Research

Project Title: Assessing the importance of program characteristics in evaluating orthopaedic surgery residency programs

Researchers: Dana Garbarski, Ph.D. and Ellen Kroin, M.D.

Introduction: You are being asked to take part in a research study being conducted by Dana Garbarski, a faculty member in the Department of Sociology at Loyola University of Chicago, and Ellen Kroin, a resident from the Loyola Department of Orthopaedic Surgery. Please read this form carefully and ask any questions you may have before deciding whether to participate in the study.

Purpose: The purpose of this study is to examine the importance of certain characteristics of orthopaedic residency programs and resources in your evaluation of the programs.

Procedures: If you agree to be in this study, you will be asked to answer survey questions about how important certain factors were in your decision to apply to certain residency programs, information about your medical school training, and demographic information like your gender, ethnicity, and year of birth. The survey should take no more than fifteen minutes to complete.

Risks/Benefits: There are no foreseeable risks involved in participating in this research beyond those experienced in everyday use of the Internet. There are no direct benefits to you from participation, but understanding which factors are important in choosing residency programs helps both future residents and their programs in these decisions.

Compensation: Once you complete the task, you can fill out a second form (not linked to the survey responses) with your email address to be entered into a drawing for a \$50 Amazon Gift Card.

Confidentiality: Since this survey does not ask you for any identifying information, you will remain anonymous and all information you provide is confidential.

Voluntary Participation: Participation in this study is voluntary. If you do not want to be in this study, you do not have to participate. Even if you decide to participate, you are free to withdraw from participation at any time without penalty.

Contacts and Questions: If you have questions about this research study, please feel free to contact the principal investigator, Dr. Dana Garbarski, at 773-508-3786 or dgarbarski@luc.edu. If you have questions about your rights as a research participant, you may contact the Loyola University Office of Research Services at 773-508-2689.

If you want to participate in the survey, click on the link provided below.

If you do not want to participate in the survey, thank you for your consideration.

Think back to when you were **applying** to orthopaedic surgery residency programs and answer how important each of the listed program characteristics were to you when you were evaluating programs.

### Q1: Instructions

**How important were each of the following factors when you were evaluating orthopaedic surgery residency programs?**

**Q2: Reputation of the program overall for orthopaedic surgery**

- Not at all    A little    Somewhat    Very    Extremely

**Q3: Reputation of the program for your orthopaedic surgery subspecialty of interest**

- Not at all    A little    Somewhat    Very  
 Extremely

**Q4: Length of the program in years**

- Not at all    A little    Somewhat    Very    Extremely

**Q5: Program has successful placement in fellowships**

- Not at all    A little    Somewhat    Very  
 Extremely

**Q6: Program time scheduling, such as work hours and time off**

- Not at all    A little    Somewhat    Very  
 Extremely

**Q7: Facilities in the program are centralized within 15 minutes of each other**

- Not at all    A little    Somewhat    Very  
 Extremely

**Q8: Program is trauma-heavy**

- Not at all    A little    Somewhat    Very  
 Extremely

**Q9: Strength of didactic curriculum in the program**

- Not at all    A little    Somewhat    Very  
 Extremely

**Q10: Program has research opportunities**

- Not at all     A little     Somewhat     Very  
 Extremely

**Q11: Program is a community program**

- Not at all     A little     Somewhat     Very  
 Extremely

**Q12: Program is an academic program**

- Not at all     A little     Somewhat     Very  
 Extremely

**Q13: Program is fellow-heavy**

- Not at all     A little     Somewhat     Very  
 Extremely

**Q14: Program has no fellows**

- Not at all     A little     Somewhat     Very  
 Extremely

**Q15: Size of the resident cohort in the program**

- Not at all     A little     Somewhat     Very  
 Extremely

**How important were each of the following factors when you were evaluating orthopaedic surgery residency programs?**

**Q16: Location meets the needs of a significant other**

- Not at all     A little     Somewhat     Very  
 Extremely

**Q17: Location amenities, such as its size and recreational opportunities**

- Not at all     A little     Somewhat     Very  
 Extremely

**Q18: Cost of living**

- Not at all     A little     Somewhat     Very  
 Extremely

**Q19: Location is close to family and friends**

- Not at all     A little     Somewhat     Very  
 Extremely

**Q20: Geographic location**

- Not at all     A little     Somewhat     Very  
 Extremely

**How important were each of the following factors when you were evaluating orthopaedic surgery residency programs?**

**Q21: Your perception of the residents' camaraderie**

- Not at all     A little     Somewhat     Very  
 Extremely

**Q22: Your perception of the residents' quality of life**

- Not at all     A little     Somewhat     Very  
 Extremely

**Q23: Your perception of the residents' happiness**

- Not at all     A little     Somewhat     Very  
 Extremely

**Q24: The program was recommended to you by a trusted source**

- Not at all     A little     Somewhat     Very  
 Extremely

**Q25: Your impression after your rotation as a medical student**

- Not at all     A little     Somewhat     Very  
 Extremely

**Q26: Your personal interactions with residents in that program**

- Not at all     A little     Somewhat     Very  
 Extremely

**Q27: Your personal interactions with faculty or program directors in that program**

- Not at all     A little     Somewhat     Very  
 Extremely

**How important were each of the following factors when you were evaluating orthopaedic surgery residency programs?**

**Q28: Presence of female residents**

- Not at all     A little     Somewhat     Very  
 Extremely

**Q29: Reputation for being family-friendly**

- Not at all     A little     Somewhat     Very     Extremely

**Q30: Reputation for gender diversity**

- Not at all     A little     Somewhat     Very  
 Extremely

**Q31: Reputation for being LGBTQ-friendly**

- Not at all    A little    Somewhat    Very    Extremely

**Q32: Presence of female faculty members**

- Not at all    A little    Somewhat    Very  
 Extremely

**How important were each of the following factors when you were evaluating orthopaedic surgery residency programs?**

**Q33: Presence of racial/ethnic minority faculty members**

- Not at all    A little    Somewhat    Very  
 Extremely

**Q34: Reputation for racial/ethnic diversity**

- Not at all    A little    Somewhat    Very  
 Extremely

**Q35: Presence of racial/ethnic minority residents**

- Not at all    A little    Somewhat    Very    Extremely

**Q36: Here are all the residency program characteristics you have considered thus far. Please rank from first to fifth the factors that were the most important to you when you were evaluating orthopaedic surgery residency programs.**

|                                            | 1st                      | 2nd                      | 3rd                      | 4th                      | 5th                      |
|--------------------------------------------|--------------------------|--------------------------|--------------------------|--------------------------|--------------------------|
| General program characteristics            |                          |                          |                          |                          |                          |
| Size of the resident cohort in the program | <input type="checkbox"/> |

|                                                                                 |                          |                          |                          |                          |                          |
|---------------------------------------------------------------------------------|--------------------------|--------------------------|--------------------------|--------------------------|--------------------------|
| Program is fellow-heavy                                                         | <input type="checkbox"/> |
| Program has no fellows                                                          | <input type="checkbox"/> |
| Length of the program in years                                                  | <input type="checkbox"/> |
| Program is an academic program                                                  | <input type="checkbox"/> |
| Program is a community program                                                  | <input type="checkbox"/> |
| Program has research opportunities                                              | <input type="checkbox"/> |
| Strength of didactic curriculum in the program                                  | <input type="checkbox"/> |
| Program is trauma-heavy                                                         | <input type="checkbox"/> |
| Facilities in the program are centralized within 15 minutes of each other       | <input type="checkbox"/> |
| Reputation of the program for your orthopaedic surgery subspecialty of interest | <input type="checkbox"/> |
| Reputation of the program overall for orthopaedic surgery                       | <input type="checkbox"/> |
| Program time scheduling, such as work hours and time off                        | <input type="checkbox"/> |
| Program has successful placement in fellowships                                 | <input type="checkbox"/> |

|                                                                              |                          |                          |                          |                          |                          |
|------------------------------------------------------------------------------|--------------------------|--------------------------|--------------------------|--------------------------|--------------------------|
| Location characteristics of the program                                      |                          |                          |                          |                          |                          |
| Geographic location                                                          | <input type="checkbox"/> |
| Location amenities, such as its size and recreational opportunities          | <input type="checkbox"/> |
| Cost of living                                                               | <input type="checkbox"/> |
| Location is close to family and friends                                      | <input type="checkbox"/> |
| Location meets the needs of a significant other                              | <input type="checkbox"/> |
| Personal knowledge of the program                                            |                          |                          |                          |                          |                          |
| Your personal interactions with faculty or program directors in that program | <input type="checkbox"/> |
| Your personal interactions with residents in that program                    | <input type="checkbox"/> |
| Your impression after your rotation as a medical student                     | <input type="checkbox"/> |
| The program was recommended to you by a trusted source                       | <input type="checkbox"/> |
| Your perception of the residents' quality of life                            | <input type="checkbox"/> |
| Your perception of the residents' happiness                                  | <input type="checkbox"/> |



|                                                                                  |                          |                          |                          |                          |                          |
|----------------------------------------------------------------------------------|--------------------------|--------------------------|--------------------------|--------------------------|--------------------------|
| Your perception of the residents' camaraderie                                    | <input type="checkbox"/> |
| Diversity of the program                                                         |                          |                          |                          |                          |                          |
| Presence of female faculty members                                               | <input type="checkbox"/> |
| Presence of female residents                                                     | <input type="checkbox"/> |
| Reputation for being family-friendly                                             | <input type="checkbox"/> |
| Reputation for gender diversity                                                  | <input type="checkbox"/> |
| Reputation for being LGBTQ-friendly                                              | <input type="checkbox"/> |
| Presence of racial/ethnic minority faculty members                               | <input type="checkbox"/> |
| Presence of racial/ethnic minority residents                                     | <input type="checkbox"/> |
| Reputation for racial/ethnic diversity                                           | <input type="checkbox"/> |
| Another important characteristic and not one of the characteristics listed above | <input type="checkbox"/> |

*Note: if you have NOT answered/chosen at least one of the following items: [(2, 41), (3, 41), (4, 41), (5, 41), (6, 41)] in question 36, skip the following question*

**Q37: Other important residency program characteristics if not listed previously:**

**How important were each of the following information resources when you were evaluating orthopaedic surgery residency programs?**

**Q38: Your communication with students and mentors from your medical school**

- Not at all    A little    Somewhat    Very    Extremely

**Q39: Printed or online program materials**

- Not at all    A little    Somewhat    Very    Extremely

**Q40: Online blog and chatrooms (i.e Orthogate, Doximity)**

- Not at all    A little    Somewhat    Very  
 Extremely

**Q41: Your communication with faculty members or residents in a residency program**

- Not at all    A little    Somewhat    Very    Extremely

**Q42: National ranking of program in US News and World Report**

- Not at all    A little    Somewhat    Very  
 Extremely

**Q43: Are you currently a resident?**

- Yes    No

*Note: if you have NOT answered/chosen item [1] in question 43, skip the following question*

**Q44: What year are you in residency?**

- PGY-1    PGY-2    PGY-3    PGY-4    PGY-5    PGY-6

*Note: if you have NOT answered/chosen item [2] in question 43, skip the following question*

**Q45: Are you currently a medical student?**

- Yes    No

*Note: if you have NOT answered/chosen item [1] in question 43, skip the following question*

**Q46: What type of medical school did you graduate from: allopathic (MD) or osteopathic (DO)?**

- Allopathic (MD)    Osteopathic (DO)

*Note: if you have NOT answered/chosen item [1] in question 43, skip the following question*

**Q47: Did you go to medical school in the US?**

- Yes    No

*Note: if you have NOT answered/chosen item [1] in question 47, skip the following question*

**Q48: In what region of the US is your medical school?**

- Northeast: Main, New Hampshire, Vermont, Massachusetts, Connecticut, Rhode Island
- Mid-Atlantic: New York, Pennsylvania, New Jersey, Delaware, Maryland, Virginia, West Virginia
- Southeast: Arkansas, Louisiana, Tennessee, Mississippi, Alabama, Georgia, Florida, South Carolina, North Carolina
- Midwest: Kansas, Nebraska, North Dakota, South Dakota, Minnesota, Iowa, Missouri, Wisconsin, Illinois, Indiana, Michigan, Ohio, Kentucky
- Southwest: Texas, Oklahoma, Colorado, Utah, Arizona, New Mexico
- West: California, Nevada
- Northwest: Washington, Oregon, Idaho, Montana, Wyoming
- Alaska or Hawaii

Note: if you have NOT answered/chosen item [1] in question 43, skip the following question

**Q49: In what range was your USMLE Step 1 score?**

- below 200    200-209    210-219    220-229    230-239    240-249    240-259  
 260-269    270-280

Note: if you have NOT answered/chosen item [1] in question 43, skip the following question

**Q50: In what range was your USMLE Step 2 score?**

- below 200    200-209    210-219    220-229    230-239    240-249    250-259  
 260-269    270-280

Note: if you have NOT answered/chosen item [1] in question 43, skip the following question

**Q51: Were you a member of Alpha Omega Alpha?**

- Yes    No

Note: if you have NOT answered/chosen item [1] in question 43, skip the following question

**Q52: How many orthopaedic surgery away rotations did you complete during medical school?**

Note: if you have NOT answered/chosen item [1] in question 43, skip the following question

**Q53: To how many orthopaedic residency programs did you apply?**

Note: if you have NOT answered/chosen item [1] in question 43, skip the following question

**Q54: Couples matching with your significant other enhances your chances of matching into a program in the same city as your significant other. Did you couples match when applying to orthopaedic residency programs?**

- Yes    No

Note: if you have NOT answered/chosen item [1] in question 45, skip the following question

**Q55: What type of medical school will you graduate from: allopathic (MD) or osteopathic (DO)?**

- Allopathic (MD)    Osteopathic (DO)

Note: if you have NOT answered/chosen item [1] in question 45, skip the following question

**Q56: Do you go to medical school in the US?**

- Yes  No

Note: if you have NOT answered/chosen item [1] in question 56, skip the following question

**Q57: In what region of the US is your medical school?**

- Northeast: Main, New Hampshire, Vermont, Massachusetts, Connecticut, Rhode Island
- Mid-Atlantic: New York, Pennsylvania, New Jersey, Delaware, Maryland, Virginia, West Virginia
- Southeast: Arkansas, Louisiana, Tennessee, Mississippi, Alabama, Georgia, Florida, South Carolina, North Carolina
- Midwest: Kansas, Nebraska, North Dakota, South Dakota, Minnesota, Iowa, Missouri, Wisconsin, Illinois, Indiana, Michigan, Ohio, Kentucky
- Southwest: Texas, Oklahoma, Colorado, Utah, Arizona, New Mexico
- West: California, Nevada
- Northwest: Washington, Oregon, Idaho, Montana, Wyoming
- Alaska or Hawaii

Note: if you have NOT answered/chosen item [1] in question 45, skip the following question

**Q58: In what range is your USMLE Step 1 Score?**

- below 200  200-209  210-219  220-229  230-239  240-249  240-259
- 260-269  270-280

Note: if you have NOT answered/chosen item [1] in question 45, skip the following question

**Q59: In what range is your USMLE Step 2 Score?**

- below 200  200-209  210-219  220-229  230-239  240-249  240-259
- 260-269  270-280

Note: if you have NOT answered/chosen item [1] in question 45, skip the following question

**Q60: Are you a member of Alpha Omega Alpha?**

- Yes  No

*Note: if you have NOT answered/chosen item [1] in question 45, skip the following question*

**Q61: How many orthopaedic surgery away rotations will you complete during medical school?**

*Note: if you have NOT answered/chosen item [1] in question 45, skip the following question*

**Q62: To how many orthopaedic surgery residency programs did you apply?**

*Note: if you have NOT answered/chosen item [1] in question 45, skip the following question*

**Q63: Couples matching with your significant other enhances your chances of matching into a program in the same city as your significant other. Did you couples match when applying to orthopaedic surgery residency programs?**

Yes  No

*Note: if you have NOT answered/chosen item [1] in question 43, skip the following question*

*Note: if you have NOT answered/chosen item [1] in question 45, skip the following question*

**Q64: Are you familiar with the Ruth Jackson Society?**

Yes  No

*Note: if you have NOT answered/chosen item [1] in question 64, skip the following question*

**Q65: Are you a member of the Ruth Jackson Society?**

Yes  No

*Note: if you have NOT answered/chosen item [1] in question 43, skip the following question*

*Note: if you have NOT answered/chosen item [1] in question 45, skip the following question*

**Q66: Are you familiar with the Nth Dimension?**

Yes  No

*Note: if you have NOT answered/chosen item [1] in question 66, skip the following question*

**Q67: Did you apply to the Nth Dimension during your medical education?**

Yes  No

*Note: if you have NOT answered/chosen item [1] in question 43, skip the following question*

*Note: if you have NOT answered/chosen item [1] in question 45, skip the following question*

**Q68: Are you familiar with the Perry Initiative?**

Yes  No

*Note: if you have NOT answered/chosen item [1] in question 68, skip the following question*

**Q69: Did you participate in the Perry Initiative during medical school?**

Yes  No

*Note: if you have NOT answered/chosen item [1] in question 43, skip the following question*

**Q70: Is there at least one female resident at your residency program?**

Yes  No

*Note: if you have NOT answered/chosen item [1] in question 43, skip the following question*

**Q71: Is there at least one female faculty member at your residency program?**

Yes  No

*Note: if you have NOT answered/chosen item [1] in question 43, skip the following question*

*Note: if you have NOT answered/chosen item [1] in question 45, skip the following question*

**Q72: In what year were you born? Please enter a four digit year.**

YYYY

*Note: if you have NOT answered/chosen item [1] in question 43, skip the following question*

*Note: if you have NOT answered/chosen item [1] in question 45, skip the following question*

**Q73: What is your gender?**

Male  Female

*Note: if you have NOT answered/chosen item [1] in question 43, skip the following question*

*Note: if you have NOT answered/chosen item [1] in question 45, skip the following question*

**Q74: Which of the following groups best describes you? Please check all that apply.**

- White
- Black or African American
- American Indian or Alaska Native
- Native Hawaiian
- Other Pacific Islander
- Asian

Something else, please tell us how you describe yourself:

If you have chosen "other", please specify:

*Note: if you have NOT answered/chosen item [1] in question 43, skip the following question*

*Note: if you have NOT answered/chosen item [1] in question 45, skip the following question*

**Q75: Do you consider yourself to be Hispanic or Latino/Latina?**

Yes  No

*Note: if you have NOT answered/chosen item [1] in question 43, skip the following question*

*Note: if you have NOT answered/chosen item [1] in question 45, skip the following question*

**Q76: Up until the time you were 16 years old, what language did you speak most often at home: English or another language?**

English  Another language

*Note: if you have NOT answered/chosen item [1] in question 43, skip the following question*

*Note: if you have NOT answered/chosen item [1] in question 45, skip the following question*

**Q77: We would like to know how many people are in your household. Include babies or small children, individuals such as roommates, and those who are away traveling, at school, or in a hospital. Including you, how many people currently live in your household at least half the time? Please enter the number:**

*Note: if you have NOT answered/chosen item [1] in question 43, skip the following question*

*Note: if you have NOT answered/chosen item [1] in question 45, skip the following question*

**Q78: Currently, are you married, separated, divorced, widowed, or have you never been married?**

Married  Separated  Divorced  Widowed  
 Never been married

*Note: if you have NOT answered/chosen item [1] in question 43, skip the following question*

*Note: if you have NOT answered/chosen item [1] in question 45, skip the following question*

**Q79: Do you have any children?**

Yes  No



*Note: if you have NOT answered/chosen item [1] in question 79, skip the following question*

**Q80: How many children do you have?**

*Note: if you have NOT answered/chosen item [2, 3, 4, 5] in question 78, skip the following question*

**Q81: Currently are you in a civil union or domestic partnership?**

- Civil union       Domestic partnership       I am in neither

**Q82: What device did you use to take this survey?**

- Computer       Tablet       Phone       Other (Please specify)

If you have chosen "other", please specify:

**Q83: Please describe below the reasons why you chose to go into orthopaedic surgery.**

Kroin E, Garbarski D, Shimomura A, Romano J, Schiff A, Wu K. Gender differences in program factors important to applicants when evaluating orthopaedic surgery residency programs. *J Grad Med Educ.* 2019;11(5):565–569.

## Supplemental Material

**TABLE**  
Additional Respondent Demographics

|                         | <b>No<br/>Response<br/>n (%)</b> | <b>Applicants<br/>n (%) or mean ± SD</b> |
|-------------------------|----------------------------------|------------------------------------------|
| Total sample            |                                  | 218 (100.0%)                             |
| Native Language English | 2 (0.9%)                         | 208 (95.4%)                              |
| Household Size          | 3 (1.4%)                         |                                          |
| Single                  |                                  | 62 (28.4%)                               |
| 2                       |                                  | 84 (38.5%)                               |
| ≥ 3                     |                                  | 69 (31.7%)                               |
| Has children            | 3 (1.4%)                         | 14 (6.4%)                                |
| Medical School Region   | 3 (1.4%)                         |                                          |
| Mid-Atlantic            |                                  | 30 (13.8%)                               |
| Midwest                 |                                  | 99 (45.4%)                               |
| Northeast               |                                  | 18 (8.3%)                                |
| Southeast               |                                  | 38 (17.4%)                               |
| West                    |                                  | 30 (13.8%)                               |

Kroin E, Garbarski D, Shimomura A, Romano J, Schiff A, Wu K. Gender differences in program factors important to applicants when evaluating orthopaedic surgery residency programs. *J Grad Med Educ.* 2019;11(5):565–569.

**TABLE**

Appendix C: “5 Most Important” Factors for All Genders

| <b>Survey Factor</b>                              | <b>Ranked in Top5</b> | <b>#1 Factor</b> | <b>Importance Score <sup>a</sup></b> |
|---------------------------------------------------|-----------------------|------------------|--------------------------------------|
| Reputation of the program for orthopaedic surgery | 49.50%                | 20.20%           | 73.9%                                |
| Program has successful placement in fellowships   | 38.50%                | 6.40%            | 88.1%                                |
| Geographic location                               | 38.10%                | 10.10%           | 67.9%                                |
| Personal interactions with residents              | 31.20%                | 10.60%           | 90.8%                                |
| Location meets the needs of a significant other   | 28.00%                | 7.80%            | 58.7%                                |

<sup>a</sup> Percentage rated as “very” or “extremely” important
